# Supplementary material for: A putative role for amino acid permeases in sink-source communication of barley tissues uncovered by RNA-seq
Source: PubMed Central journal article supplement (PMC3495740; doi:10.1186/1471-2229-12-154), 2012-08-30
Supplement: 1471-2229-12-154-S3.pdf [file 1471-2229-12-154-S3.pdf]

### Amino acid transporters

|           |      | ATF group |      |      |      |      |      |      |      | ARO  | APC group |      |      |
|-----------|------|-----------|------|------|------|------|------|------|------|------|-----------|------|------|
|           |      | AAP       | ANT1 | ANT2 | ANT3 | LHT  | ProT | GAT  | AUX  |      | LAT       | BAT  | CAT  |
| ATF group | AAP  | 54,9      | 17,3 | 16,9 | 14,0 | 25,5 | 21,6 | 24,0 | 16,0 | 8,3  | 9,2       | 8,8  | 9,0  |
|           | ANT1 |           | 41,4 | 24,3 | 17,7 | 18,8 | 16,5 | 17,8 | 15,8 | 8,4  | 9,8       | 8,4  | 9,8  |
|           | ANT2 |           |      | 52,5 | 18,2 | 17,1 | 17,0 | 18,0 | 15,5 | 8,6  | 9,3       | 7,9  | 10,1 |
|           | ANT3 |           |      |      | 54,2 | 14,7 | 15,2 | 14,5 | 12,0 | 8,1  | 9,1       | 7,7  | 8,9  |
|           | LHT  |           |      |      |      | 53,4 | 21,6 | 25,1 | 16,3 | 8,4  | 9,2       | 7,3  | 9,9  |
|           | ProT |           |      |      |      |      | 68,5 | 27,6 | 13,7 | 8,2  | 10,2      | 8,2  | 9,4  |
|           | GAT  |           |      |      |      |      |      | 51,3 | 19,7 | 7,7  | 9,1       | 8,4  | 10,2 |
|           | AUX  |           |      |      |      |      |      |      | 78,0 | 7,5  | 8,0       | 8,3  | 9,1  |
| ARO       |      |           |      |      |      |      |      |      |      | 37,4 | 8,5       | 8,2  | 8,8  |
| APC group | LAT  |           |      |      |      |      |      |      |      |      | 48,8      | 12,9 | 13,9 |
|           | BAT  |           |      |      |      |      |      |      |      |      |           | 67,5 | 12,2 |
|           | CAT  |           |      |      |      |      |      |      |      |      |           |      | 39,0 |

Additional Figure 2 Sequence distance matrices of AAT genes from Lasergene data. Only percent similarity is shown.
