# Supplementary material for: A putative role for amino acid permeases in sink-source communication of barley tissues uncovered by RNA-seq
Source: PubMed Central journal article supplement (PMC3495740; doi:10.1186/1471-2229-12-154), 2012-08-30
Supplement: 1471-2229-12-154-S5.pdf [file 1471-2229-12-154-S5.pdf]

**NRT1/PTR transporters**

|                                  |     | subgroup according to Tsay et al |      |      |      |
|----------------------------------|-----|----------------------------------|------|------|------|
|                                  |     | I                                | II   | III  | IV   |
| subgroup according to Tsay et al | I   | 39,1                             | 33,5 | 32,1 | 30,3 |
|                                  | II  | ***                              | 44,6 | 34,6 | 32,0 |
|                                  | III |                                  | ***  | 42,3 | 30,1 |
|                                  | IV  |                                  |      | ***  | 37,9 |

**Additional Figure 4** Sequence distance matrices of *NRT1/PTR* genes from Lasergene data. Only percent similarity is shown.
