# Supplementary material for: A putative role for amino acid permeases in sink-source communication of barley tissues uncovered by RNA-seq
Source: PubMed Central journal article supplement (PMC3495740; doi:10.1186/1471-2229-12-154), 2012-08-30
Supplement: 1471-2229-12-154-S6.pdf [file 1471-2229-12-154-S6.pdf]

### OPT transporters

|           | OPT  | YSL total | YSL1 | YSL2 | YSL3 | YSL4 |
|-----------|------|-----------|------|------|------|------|
| OPT       | 56,8 | 12,5      | 13,0 | 11,4 | 12,6 | 12,2 |
| YSL total |      | 52,8      | 48,7 | 50,0 | 51,2 | 41,2 |
| YSL1      |      |           | 69,4 | 51,4 | 53,3 | 39,7 |
| YSL2      |      |           |      | 73,0 | 55,8 | 39,0 |
| YSL3      |      |           |      |      | 70,9 | 44,1 |
| YSL4      |      |           |      |      |      | 45,6 |

**Additional Figure 6 Sequence distance matrices of *OPT* genes from DNASTar data. Only percent similarity is shown.**
