# Supplementary material for: A putative role for amino acid permeases in sink-source communication of barley tissues uncovered by RNA-seq
Source: PubMed Central journal article supplement (PMC3495740; doi:10.1186/1471-2229-12-154), 2012-08-30
Supplement: 1471-2229-12-154-S8.pdf [file 1471-2229-12-154-S8.pdf]

### Additional Table 3 EMBL accessions of N Transporters

| <b>EMBL accessions</b> | <b>Transporter name</b> | <b>Data source</b> |
|------------------------|-------------------------|--------------------|
| HE820742               | HvAAP1                  | IPK EST collection |
| HE820743               | HvAAP2                  | IPK EST collection |
| HE858194               | HvPTR2                  | IPK EST collection |
| HE858195               | HvPTR3                  | IPK EST collection |
| HE858196               | HvPTR6                  | IPK EST collection |
| HE965462               | HvAAP1-5                | RNA-seq            |
| HE965463               | HvAAP1-3                | RNA-seq            |
| HE965464               | HvAAP2-3                | RNA-seq            |
| HE965465               | HvAAP3                  | RNA-seq            |
| HE965466               | HvAAP4                  | RNA-seq            |
| HE965467               | HvAAP5                  | RNA-seq            |
| HE965468               | HvAAP6                  | RNA-seq            |
| HE965469               | HvAAP7                  | RNA-seq            |
| HE965470               | HvAAP8                  | RNA-seq            |
| HE965471               | HvAAP9                  | RNA-seq            |
| HE965472               | HvAAP10                 | RNA-seq            |
| HE965473               | HvAAP11                 | RNA-seq            |
| HE965474               | HvAAP12                 | RNA-seq            |
| HE965475               | HvAAP13                 | RNA-seq            |
| HE965476               | HvAAP14                 | RNA-seq            |
| HE965477               | HvANT1                  | RNA-seq            |
| HE965478               | HvANT2                  | RNA-seq            |
| HE965479               | HvANT3                  | RNA-seq            |
| HE965480               | HvANT4                  | RNA-seq            |
| HE965481               | HvANT5                  | RNA-seq            |
| HE965482               | HvANT6                  | RNA-seq            |
| HE965483               | HvANT7                  | RNA-seq            |
| HE965484               | HvANT8                  | RNA-seq            |
| HE965485               | HvANT9                  | RNA-seq            |
| HE965486               | HvANT10                 | RNA-seq            |
| HE965487               | HvANT11                 | RNA-seq            |
| HE965488               | HvANT12                 | RNA-seq            |
| HE965489               | HvANT13                 | RNA-seq            |
| HE965490               | HvANT14                 | RNA-seq            |
| HE965491               | HvANT15                 | RNA-seq            |
| HE965492               | HvANT16                 | RNA-seq            |
| HE965493               | HvANT17                 | RNA-seq            |

| <b>EMBL accessions</b> | <b>Transporter name</b> | <b>Data source</b> |
|------------------------|-------------------------|--------------------|
| HE965494               | HvANT18                 | RNA-seq            |
| HE965495               | HvAUX1-5                | RNA-seq            |
| HE965496               | HvAUX2                  | RNA-seq            |
| HE965497               | HvARO1                  | RNA-seq            |
| HE965498               | HvARO2                  | RNA-seq            |
| HE965499               | HvCAT1                  | RNA-seq            |
| HE965500               | HvCAT2                  | RNA-seq            |
| HE965501               | HvCAT3                  | RNA-seq            |
| HE965502               | HvCAT4                  | RNA-seq            |
| HE965503               | HvCAT5                  | RNA-seq            |
| HE965504               | HvCAT6                  | RNA-seq            |
| HE965505               | HvCAT7                  | RNA-seq            |
| HE965506               | HvBAT2                  | RNA-seq            |
| HE965507               | HvBAT3                  | RNA-seq            |
| HE965508               | HvGAT1                  | RNA-seq            |
| HE965509               | HvLAT1                  | RNA-seq            |
| HE965510               | HvLAT2                  | RNA-seq            |
| HE965511               | HvLAT3                  | RNA-seq            |
| HE965512               | HvLAT4                  | RNA-seq            |
| HE965513               | HvLHT1                  | RNA-seq            |
| HE965514               | HvLHT2                  | RNA-seq            |
| HE965515               | HvLHT3                  | RNA-seq            |
| HE965516               | HvLHT4                  | RNA-seq            |
| HE965517               | HvLHT5                  | RNA-seq            |
| HE965518               | HvProT1                 | RNA-seq            |
| HE965519               | HvProT2                 | RNA-seq            |
| HE965520               | HvOPT1                  | RNA-seq            |
| HE965521               | HvOPT2                  | RNA-seq            |
| HE965522               | HvOPT3                  | RNA-seq            |
| HE965523               | HvOPT4                  | RNA-seq            |
| HE965524               | HvOPT5                  | RNA-seq            |
| HE965525               | HvOPT6                  | RNA-seq            |
| HE965526               | HvOPT7                  | RNA-seq            |
| HE965527               | HvOPT8                  | RNA-seq            |
| HE965528               | HvOPT9                  | RNA-seq            |
| HE965529               | HvOPT10                 | RNA-seq            |
| HE965530               | HvOPT11                 | RNA-seq            |
| HE965531               | HvYSL1                  | RNA-seq            |
| HE965532               | HvYSL2-5                | RNA-seq            |

| <b>EMBL accessions</b> | <b>Transporter name</b> | <b>Data source</b> |
|------------------------|-------------------------|--------------------|
| HE965533               | HvYSL2-3                | RNA-seq            |
| HE965534               | HvYSL3                  | RNA-seq            |
| HE965535               | HvYSL4                  | RNA-seq            |
| HE965536               | HvYSL6                  | RNA-seq            |
| HE965537               | HvYSL7-5                | RNA-seq            |
| HE965538               | HvYSL7-3                | RNA-seq            |
| HE965539               | HvYSL8-5                | RNA-seq            |
| HE965540               | HvYSL8-3                | RNA-seq            |
| HE965541               | HvYSL9                  | RNA-seq            |
| HE965542               | HvYSL10                 | RNA-seq            |
| HE965543               | HvYSL11                 | RNA-seq            |
| HE965544               | HvYSL12                 | RNA-seq            |
| HE965545               | HvNRT1(PTR)I-1          | RNA-seq            |
| HE965546               | HvNRT1(PTR)I-2          | RNA-seq            |
| HE965547               | HvNRT1(PTR)I-3-5        | RNA-seq            |
| HE965548               | HvNRT1(PTR)I-3-3        | RNA-seq            |
| HE965549               | HvNRT1(PTR)I-4-5        | RNA-seq            |
| HE965550               | HvNRT1(PTR)I-4-3        | RNA-seq            |
| HE965551               | HvNRT1(PTR)I-5          | RNA-seq            |
| HE965552               | HvNRT1(PTR)I-6          | RNA-seq            |
| HE965553               | HvNRT1(PTR)I-7          | RNA-seq            |
| HE965554               | HvNRT1(PTR)I-8          | RNA-seq            |
| HE965555               | HvNRT1(PTR)II-1-5       | RNA-seq            |
| HE965556               | HvNRT1(PTR)II-1-3       | RNA-seq            |
| HE965557               | HvNRT1(PTR)II-2         | RNA-seq            |
| HE965558               | HvNRT1(PTR)II-3-5       | RNA-seq            |
| HE965559               | HvNRT1(PTR)II-3-3       | RNA-seq            |
| HE965560               | HvNRT1(PTR)II-4         | RNA-seq            |
| HE965561               | HvNRT1(PTR)II-5         | RNA-seq            |
| HE965562               | HvNRT1(PTR)II-6         | RNA-seq            |
| HE965563               | HvNRT1(PTR)II-7         | RNA-seq            |
| HE965564               | HvNRT1(PTR)II-8         | RNA-seq            |
| HE965565               | HvNRT1(PTR)II-9         | RNA-seq            |
| HE965566               | HvNRT1(PTR)II-10        | RNA-seq            |
| HE965567               | HvNRT1(PTR)II-11        | RNA-seq            |
| HE965568               | HvNRT1(PTR)II-12        | RNA-seq            |
| HE965569               | HvNRT1(PTR)II-13        | RNA-seq            |
| HE965570               | HvNRT1(PTR)II-14-5      | RNA-seq            |
| HE965571               | HvNRT1(PTR)II-14-3      | RNA-seq            |

| <b>EMBL accessions</b> | <b>Transporter name</b> | <b>Data source</b> |
|------------------------|-------------------------|--------------------|
| HE965572               | HvNRT1(PTR)II-15        | RNA-seq            |
| HE965573               | HvNRT1(PTR)II-16        | RNA-seq            |
| HE965574               | HvNRT1(PTR)II-17        | RNA-seq            |
| HE965575               | HvNRT1(PTR)III-1-5      | RNA-seq            |
| HE965576               | HvNRT1(PTR)III-1-3      | RNA-seq            |
| HE965577               | HvNRT1(PTR)III-2        | RNA-seq            |
| HE965578               | HvNRT1(PTR)III-3        | RNA-seq            |
| HE965579               | HvNRT1(PTR)III-4-5      | RNA-seq            |
| HE965580               | HvNRT1(PTR)III-4-3      | RNA-seq            |
| HE965581               | HvNRT1(PTR)III-5-5      | RNA-seq            |
| HE965582               | HvNRT1(PTR)III-5-3      | RNA-seq            |
| HE965583               | HvNRT1(PTR)III-6-5      | RNA-seq            |
| HE965584               | HvNRT1(PTR)III-6-3      | RNA-seq            |
| HE965585               | HvNRT1(PTR)III-7        | RNA-seq            |
| HE965586               | HvNRT1(PTR)III-8        | RNA-seq            |
| HE965587               | HvNRT1(PTR)III-9        | RNA-seq            |
| HE965588               | HvNRT1(PTR)III-10       | RNA-seq            |
| HE965589               | HvNRT1(PTR)III-11       | RNA-seq            |
| HE965590               | HvNRT1(PTR)III-12       | RNA-seq            |
| HE965591               | HvNRT1(PTR)III-13       | RNA-seq            |
| HE965592               | HvNRT1(PTR)III-14       | RNA-seq            |
| HE965593               | HvNRT1(PTR)IV-1-5       | RNA-seq            |
| HE965594               | HvNRT1(PTR)IV-1-3       | RNA-seq            |
| HE965595               | HvNRT1(PTR)IV-2         | RNA-seq            |
| HE965596               | HvNRT1(PTR)IV-3         | RNA-seq            |
| HE965597               | HvNRT1(PTR)IV-4         | RNA-seq            |
| HE965598               | HvNRT1(PTR)IV-5         | RNA-seq            |
| HE965599               | HvPTR1-5                | RNA-seq            |
| HE965600               | HvPTR1-3                | RNA-seq            |
| HE965601               | HvPTR1-like_1           | RNA-seq            |
| HE965602               | HvPTR1-like_2           | RNA-seq            |
| HE965603               | HvPTR1-like_3           | RNA-seq            |
| HE965604               | HvPTR1-like_4           | RNA-seq            |
| HE965605               | HvPTR1-like_5           | RNA-seq            |
| HE965606               | HvPTR1-like_6           | RNA-seq            |
| HE965607               | HvPTR1-like_7           | RNA-seq            |
| HE965608               | HvPTR1-like_8           | RNA-seq            |
| HE965609               | HvPTR1-like_9           | RNA-seq            |
| HE965610               | HvPTR1-like_10          | RNA-seq            |

| <b>EMBL accessions</b> | <b>Transporter name</b> | <b>Data source</b> |
|------------------------|-------------------------|--------------------|
| HE965611               | HvPTR1-like_11          | RNA-seq            |
| HE965612               | HvPTR1-like_12          | RNA-seq            |
| HE965613               | HvPTR1-like_13          | RNA-seq            |
| HE965614               | HvPTR1-like_14          | RNA-seq            |
| HE965615               | HvPTR1-like_15          | RNA-seq            |
| HE965616               | HvPTR1-like_16          | RNA-seq            |
| HE965617               | HvPTR1-like_17          | RNA-seq            |
| HE965618               | HvPTR1-like_18          | RNA-seq            |
| HE965619               | HvPTR1-like_19          | RNA-seq            |
| HE965620               | HvPTR1-like_20          | RNA-seq            |
| HE965621               | HvPTR1-like_21          | RNA-seq            |
| HE965622               | HvPTR1-like_22          | RNA-seq            |
| HE965623               | HvPTR1-like_23          | RNA-seq            |
| HE965624               | HvPTR1-like_24          | RNA-seq            |
| HE965625               | HvPTR1-like_25          | RNA-seq            |
| HE965626               | HvPTR1-like_26          | RNA-seq            |
