# Supplementary material for: A putative role for amino acid permeases in sink-source communication of barley tissues uncovered by RNA-seq
Source: PubMed Central journal article supplement (PMC3495740; doi:10.1186/1471-2229-12-154), 2012-08-30
Supplement: 1471-2229-12-154-S9.pdf [file 1471-2229-12-154-S9.pdf]

**Additional Table 1 Primers used in qRT-PCR**

| <b>Gene</b>    | <b>forward (5'-3')</b> | <b>reverse (5'-3')</b>  |
|----------------|------------------------|-------------------------|
| <i>Actin</i>   | GTGGATCTCGAAGGGTGAGT   | AGCACTTCCGGTGGACAAT     |
| <i>HvAAP2</i>  | TCGGCGCCATCGGGTTCT     | CGGCGGCAGCAATGGTGA      |
| <i>HvCAT1</i>  | TTAAAGCGGCGCAAACAGC    | AAGCCGAAGCCGTCAGGATTAG  |
| <i>HvANT1</i>  | TGCCGTGGTTTTTGTTCATC   | TCCGCGGTTCCCTTCTATCAGTC |
| <i>HvAro2</i>  | GTGGGGATGGGGGTGTTCTCTG | TGCAGGGGGTCTCCGTTTACAA  |
| <i>HvCAT5</i>  | ACCCGCCTCGTTTTTCTTGTC  | ACCCACAGCGATGAGACTAA    |
| <i>HvProT1</i> | GGCGCTCAGCACATCCCTCTC  | GCGGCGATAGCAGCGGTGAT    |
| <i>HvAUX1</i>  | CGCCGCTCTACTTCGTGTGG   | GAGGGCGCGGAGGCAGAC      |
| <i>HvLHT1</i>  | GCCTCCGCGCTCTGCTACTC   | CGGCCGGCCTTGCTTGA       |
| <i>HvANT4</i>  | TAATGCCCGCCTTGCTTCTT   | CTGCGTGCGTGTGGCTTTATTC  |
| <i>HvANT2</i>  | GGCCGCGGACAAGAAGAAGT   | GTACCCCATGACACCGAACAGC  |
| <i>HvAAP3</i>  | TCGCCGAGTCATGTCCTTCTC  | TCAGTGCCGCCATTGTTGTCT   |
| <i>HvANT5</i>  | CCGCCGCTGTGATGGGATAC   | TGACTTCGCGGCAGCAACTCTT  |
| <i>HvLAT1</i>  | TCATTGCCGCGGAGAACTACCT | AAGCCAGCACCATCACCACGAC  |
| <i>HvANT3</i>  | CGCGCAATGAAATACGAGATGA | ACTGCCCGGAGAATGAAGC     |
| <i>HvAro1</i>  | AGCGCCTCTTCTCCAATGTCAA | ATACTCCCTGGCTCGTGCTTCA  |
| <i>HvProT2</i> | GGATACCGCGCACCAGATTAGC | GGAGGCGACCAAGCAGAGCA    |
| <i>HvAAP4</i>  | TTTGCCGCTCACCGTCTACTT  | GAGCCCCTGCACCGAACCA     |
| <i>HvAAP5</i>  | GATACGCGGCATTTGGTTCAGA | GGGGCCGTCAGTATGTTGC     |
| <i>HvAAP6</i>  | TCGGCAACGTGGTGGGACTT   | GCCGCGCTGCCTGATGTA      |
| <i>HvAAP1</i>  | GCAACATCGCCTTCGCCTACT  | TTATCCCCGTCGCCTTCTTCAT  |
| <i>HvLHT2</i>  | ATCATCGCCGCTGCTACTTCC  | TCAAACACCGGCATCGCATAAA  |
| <i>HvANT6</i>  | GCCGCTGCTCCCGACGAA     | GCCGACGATGGTGGTGGACAG   |
| <i>HvLHT4</i>  | AACGGCCGGCAGCAATCTCTTA | GGCCCCGCGCCACATAGG      |
| <i>HvANT17</i> | AGAGCTGCTGCCTCCGAATAGA | CGCCACAAACATGGTGAGAAGA  |
| <i>HvAAP7</i>  | CAGGGGGTCATCAGCCAGAAGC | ATGCTCCCCGATCGCTCTAACC  |
